# Supplementary material for: Identification of Immune-Related Genes and Small-Molecule Drugs in Interstitial Cystitis/Bladder Pain Syndrome Based on the Integrative Machine Learning Algorithms and Molecular Docking
Source: Hindawi journal article supplement (doi:10.1155/2022/2069756), 2022-12-28
Supplement: f1 [file 2069756.f1.zip]

| Basic information of GEO datasets |      |                |                                             |             |
|-----------------------------------|------|----------------|---------------------------------------------|-------------|
| GSE series                        | Type | Sample size    |                                             | Platform    |
|                                   |      | Normal control | Interstitial cystitis/bladder pain syndrome |             |
| GSE11783                          | mRNA |                | 6                                           | 10 GPL570   |
| GSE11839                          | mRNA |                | 6                                           | 6 GPL570    |
| GSE28242                          | mRNA |                | 5                                           | 8 GPL6244   |
| GSE57560                          | mRNA |                | 3                                           | 13 GPL16699 |
